# Supplementary material
Source: PubMed Central journal article supplement (PMC5958379)

**Supplemental Image:** HA35-induces  $\beta$ -defensin expression at colon epithelial cell surface. Co-localization of biotinylated HA35 (green) and  $\beta$ -defensin (red), co-localization (yellow) was detected in proximal colon from mice fed 300ug of biotinylated HA35 (b-HA35).

Immunohistochemical staining with streptavidin-488 for HA35 and rabbit anti-murine  $\beta$ -defensin, goat anti-rabbit AlexaFluor 568 was performed as described in methods. Nuclei were stained with VectaShield containing DAPI (blue). Image captured with Leica confocal microscopy and deconvoluted with Volocity-Restoration Software (PerkinElmer, Waltham, MA). Scale bar is 25 $\mu$ m.

### **Supplemental Video**

High resolution video provides a three dimensional view of HA35 (green) and  $\beta$ -defensin (red) co-localization (yellow) at the epithelial cell surface in the mouse colon.

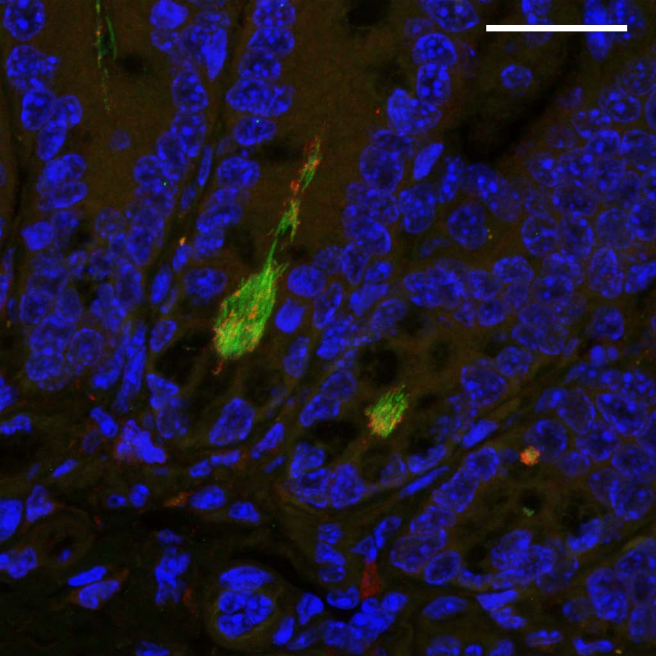

Supplement: JHC746775_Supplemental_Material.pdf [file JHC746775_Supplemental_Material.pdf]
